# Supplementary material for: Middle-aged and older adults’ acceptance of mobile nutrition and fitness apps: A systematic mixed studies review
Source: PubMed Central journal article supplement (PMC9754197; doi:10.1371/journal.pone.0278879), 2022-12-15
Supplement: pone.0278879.s002.pdf [file pone.0278879.s002.pdf]

**First search strategy for EMBASE**

Database: Embase Classic+Embase &lt;1947 to 2020 December 03&gt;

Search Strategy:

- 
- 1 Mobile Applications/ (11330)
  - 2 ((Mobil\* adj2 Application\*) or (Mobil\* adj2 App?) or (Portable adj2 Electronic App\*) or (Portable adj2 Software App\*)).ab,ti. (8593)
  - 3 exp mobile phone/ (31096)
  - 4 personal digital assistant/ (1533)
  - 5 (handheld adj1 (computer? or pc?)).ab,ti. (532)
  - 6 cell\$ phone.ab,ti. (3279)
  - 7 mobile phone?.ab,ti. (10670)
  - 8 smartphone?.ab,ti. (16421)
  - 9 palmtop computer?.ab,ti. (98)
  - 10 (tablet adj3 (device? or comput\$)).ab,ti. (2275)
  - 11 1 or 2 or 3 or 4 or 5 or 6 or 7 or 8 or 9 or 10 (50725)
  - 12 exp exercise/ (380385)
  - 13 exp fitness/ (41280)
  - 14 exp sport/ (180091)
  - 15 exp Endurance/ (25295)
  - 16 exercis\*.ab,ti. (425441)
  - 17 sport\*.ab,ti. (106522)
  - 18 ((physical or motion) adj5 (fitness or therapy or therapies)).ab,ti. (54935)
  - 19 12 or 13 or 14 or 15 or 16 or 17 or 18 (774133)
  - 20 geriatric nutrition/ (917)
  - 21 exp diet/ (382655)
  - 22 nutri\*.ab,ti. (552083)
  - 23 diet.ab,ti. (468271)
  - 24 caloric intake/ (64963)
  - 25 food.ab,ti. (557532)
  - 26 eating.ab,ti. (105475)
  - 27 20 or 21 or 22 or 23 or 24 or 25 or 26 (1526127)
  - 28 19 or 27 (2219820)
  - 29 11 and 28 (5729)
  - 30 limit 29 to (embryo <first trimester> or infant <to one year> or child <unspecified age> or preschool child <1 to 6 years> or school child <7 to 12 years> or adolescent <13 to 17 years>) (974)
  - 31 29 not 30 (4755)
  - 32 limit 31 to animal/ (64)
  - 33 31 not 32 (4691)
  - 34 limit 33 to yr="2019-2020" (1656)
  - 35 limit 34 to exclude medline journals (225)

\*\*\*\*\*

**Second search strategy for EMBASE**

Database: Embase &lt;1974 to 2019 January 07&gt;

Search Strategy:

- 
- 1 Mobile Applications/ (6058)
  - 2 ((Mobil\* adj2 Application\*) or (Mobil\* adj2 App?) or (Portable adj2 Electronic App\*) or (Portable adj2 Software App\*)).ab,ti. (4859)
  - 3 exp mobile phone/ (21506)
  - 4 personal digital assistant/ (1294)
  - 5 (handheld adj1 (computer? or pc?)).ab,ti. (513)
  - 6 cell\$ phone.ab,ti. (2743)
  - 7 mobile phone?.ab,ti. (8177)
  - 8 smartphone?.ab,ti. (9499)
  - 9 palmtop computer?.ab,ti. (97)
  - 10 (tablet adj3 (device? or comput\$)).ab,ti. (1719)
  - 11 1 or 2 or 3 or 4 or 5 or 6 or 7 or 8 or 9 or 10 (34249)
  - 12 exp exercise/ (302573)
  - 13 exp fitness/ (35068)
  - 14 exp sport/ (144583)
  - 15 exp Endurance/ (21658)
  - 16 exercis\*.ab,ti. (350831)
  - 17 sport\*.ab,ti. (86205)
  - 18 ((physical or motion) adj5 (fitness or therapy or therapies)).ab,ti. (43069)
  - 19 12 or 13 or 14 or 15 or 16 or 17 or 18 (627488)
  - 20 geriatric nutrition/ (809)
  - 21 exp diet/ (287174)
  - 22 nutri\*.ab,ti. (445782)
  - 23 diet.ab,ti. (376013)
  - 24 caloric intake/ (55837)
  - 25 food.ab,ti. (450501)
  - 26 eating.ab,ti. (87442)
  - 27 20 or 21 or 22 or 23 or 24 or 25 or 26 (1226045)
  - 28 19 or 27 (1786426)
  - 29 11 and 28 (3548)
  - 30 limit 29 to (embryo <first trimester> or infant <to one year> or child <unspecified age> or preschool child <1 to 6 years> or school child <7 to 12 years> or adolescent <13 to 17 years>) (600)
  - 31 29 not 30 (2948)
  - 32 limit 31 to animal/ (47)
  - 33 31 not 32 (2901)
  - 34 limit 33 to yr="2008 - 2019" (2819)
  - 35 limit 34 to exclude medline journals (363)

\*\*\*\*\*

**First search strategy for Medline**

Database: Ovid MEDLINE(R) ALL &lt;1946 to December 03, 2020&gt;

Search Strategy:

- 
- 1 Mobile Applications/ (6611)
  - 2 ((Mobil\* adj2 Application\*) or (Mobil\* adj2 App?) or (Portable adj2 Electronic App\*) or (Portable adj2 Software App\*)).ab,ti. (6643)
  - 3 exp Cellular Phone/ (11095)
  - 4 Computers, Handheld/ (3677)
  - 5 (handheld adj1 (computer? or pc?)).ab,ti. (440)
  - 6 cell\$ phone.ab,ti. (2333)
  - 7 mobile phone?.ab,ti. (8536)
  - 8 smartphone?.ab,ti. (12259)
  - 9 palmtop computer?.ab,ti. (92)
  - 10 (tablet adj3 (device? or comput\$)).ab,ti. (1448)
  - 11 1 or 2 or 3 or 4 or 5 or 6 or 7 or 8 or 9 or 10 (37622)
  - 12 exp exercise/ (200829)
  - 13 exp Physical Fitness/ (30945)
  - 14 exp sports/ (186396)
  - 15 exp Physical Endurance/ (34015)
  - 16 exercis\*.ab,ti. (299970)
  - 17 sport\*.ab,ti. (77248)
  - 18 ((physical or motion) adj5 (fitness or therapy or therapies)).ab,ti. (35606)
  - 19 12 or 13 or 14 or 15 or 16 or 17 or 18 (546380)
  - 20 Elder Nutritional Physiological Phenomena/ (229)
  - 21 exp diet/ (285142)
  - 22 nutri\*.ab,ti. (411823)
  - 23 diet.ab,ti. (329247)
  - 24 energy intake/ (41148)
  - 25 food.ab,ti. (431788)
  - 26 eating.ab,ti. (76623)
  - 27 20 or 21 or 22 or 23 or 24 or 25 or 26 (1167258)
  - 28 19 or 27 (1656502)
  - 29 11 and 28 (4235)
  - 30 limit 29 to ("all infant (birth to 23 months)" or "all child (0 to 18 years)" or "newborn infant (birth to 1 month)" or "infant (1 to 23 months)" or "preschool child (2 to 5 years)" or "child (6 to 12 years)" or "adolescent (13 to 18 years)" or "young adult (19 to 24 years)" or "adult (19 to 44 years)" or "young adult and adult (19-24 and 19-44)") (1765)
  - 31 29 not 30 (2470)
  - 32 limit 31 to animals/ (56)
  - 33 31 not 32 (2414)
  - 34 limit 33 to yr="2019 - 2020" (965)

\*\*\*\*\*

**Second search strategy for Medline**

Datenbank: Ovid MEDLINE(R) and Epub Ahead of Print, In-Process & Other Non-Indexed Citations and Daily <1946 to January 07, 2019>

Suchstrategie:

-----

- 1 Mobile Applications/ (3635)
- 2 ((Mobil\* adj2 Application\*) or (Mobil\* adj2 App?) or (Portable adj2 Electronic App\*) or (Portable adj2 Software App\*)).ab,ti. (3914)
- 3 exp Cellular Phone/ (9113)
- 4 Computers, Handheld/ (3294)
- 5 (handheld adj1 (computer? or pc?)).ab,ti. (433)
- 6 cell\$ phone.ab,ti. (2027)
- 7 mobile phone?.ab,ti. (6650)
- 8 smartphone?.ab,ti. (7170)
- 9 palmtop computer?.ab,ti. (91)
- 10 (tablet adj3 (device? or comput\$)).ab,ti. (1086)
- 11 1 or 2 or 3 or 4 or 5 or 6 or 7 or 8 or 9 or 10 (26221)
- 12 exp exercise/ (173218)
- 13 exp Physical Fitness/ (26607)
- 14 exp sports/ (168135)
- 15 exp Physical Endurance/ (31262)
- 16 exercis\*.ab,ti. (267098)
- 17 sport\*.ab,ti. (65505)
- 18 ((physical or motion) adj5 (fitness or therapy or therapies)).ab,ti. (30724)
- 19 12 or 13 or 14 or 15 or 16 or 17 or 18 (480656)
- 20 Elder Nutritional Physiological Phenomena/ (211)
- 21 exp diet/ (257436)
- 22 nutri\*.ab,ti. (355446)
- 23 diet.ab,ti. (290723)
- 24 energy intake/ (38342)
- 25 food.ab,ti. (367017)
- 26 eating.ab,ti. (65872)
- 27 20 or 21 or 22 or 23 or 24 or 25 or 26 (1019936)
- 28 19 or 27 (1451507)
- 29 11 and 28 (2678)
- 30 limit 29 to ("all infant (birth to 23 months)" or "all child (0 to 18 years)" or "newborn infant (birth to 1 month)" or "infant (1 to 23 months)" or "preschool child (2 to 5 years)" or "child (6 to 12 years)" or "adolescent (13 to 18 years)" or "young adult (19 to 24 years)" or "adult (19 to 44 years)" or "young adult and adult (19-24 and 19-44)") (1091)
- 31 29 not 30 (1587)
- 32 limit 31 to animals/ (39)
- 33 31 not 32 (1548)
- 34 limit 33 to yr="2008 - 2019" (1505)

\*\*\*\*\*
