# Supplementary material for: Middle-aged and older adults’ acceptance of mobile nutrition and fitness apps: A systematic mixed studies review
Source: PubMed Central journal article supplement (PMC9754197; doi:10.1371/journal.pone.0278879), 2022-12-15
Supplement: pone.0278879.s004.pdf [file pone.0278879.s004.pdf]

**AXIS quality appraisal**

| <b>Bol et al. (2017)</b> |                                                                                                |            |           |                   |                       |
|--------------------------|------------------------------------------------------------------------------------------------|------------|-----------|-------------------|-----------------------|
|                          | <b>QUESTION</b>                                                                                | <b>YES</b> | <b>NO</b> | <b>Don't know</b> | <b>Not applicable</b> |
| <i>Introduction</i>      |                                                                                                |            |           |                   |                       |
| 1                        | Were the aims/objectives of the study clear?                                                   | x          |           |                   |                       |
| <i>Methods</i>           |                                                                                                |            |           |                   |                       |
| 2                        | Was the study design appropriate for the stated aim(s)?                                        | x          |           |                   |                       |
| 3                        | Was the sample size justified?                                                                 | x          |           |                   |                       |
| 4                        | Was the target/reference population clearly defined? (Is it clear who the research was about?) | x          |           |                   |                       |

|                |                                                                                                                                                       |   |  |   |  |
|----------------|-------------------------------------------------------------------------------------------------------------------------------------------------------|---|--|---|--|
| 5              | Was the sample frame taken from an appropriate population base so that it closely represented the target/reference population under investigation?    | x |  |   |  |
| 6              | Was the selection process likely to select subjects/participants that were representative of the target/reference population under investigation?     |   |  | x |  |
| 7              | Were measures undertaken to address and categorise non-responders?                                                                                    |   |  | x |  |
| 8              | Were the risk factor and outcome variables measured appropriate to the aims of the study?                                                             | x |  |   |  |
| 9              | Were the risk factor and outcome variables measured correctly using instruments/measurements that had been trialled, piloted or published previously? | x |  |   |  |
| 10             | Is it clear what was used to determine statistical significance and/or precision estimates? (e.g. p-values, confidence intervals)                     | x |  |   |  |
| 11             | Were the methods (including statistical methods) sufficiently described to enable them to be repeated?                                                | x |  |   |  |
| <i>Results</i> |                                                                                                                                                       |   |  |   |  |

|                   |                                                                           |   |   |  |  |
|-------------------|---------------------------------------------------------------------------|---|---|--|--|
| 12                | Were the basic data adequately described?                                 | x |   |  |  |
| 13                | Does the response rate raise concerns about non-response bias?            |   | x |  |  |
| 14                | If appropriate, was information about non-responders described?           |   | x |  |  |
| 15                | Were the results internally consistent?                                   | x |   |  |  |
| 16                | Were the results presented for all the analyses described in the methods? | x |   |  |  |
| <i>Discussion</i> |                                                                           |   |   |  |  |
| 17                | Were the authors' discussions and conclusions justified by the results?   | x |   |  |  |
| 18                | Were the limitations of the study discussed?                              | x |   |  |  |
| <i>Other</i>      |                                                                           |   |   |  |  |

|    |                                                                                                                     |   |   |  |  |
|----|---------------------------------------------------------------------------------------------------------------------|---|---|--|--|
| 19 | Were there any funding sources or conflicts of interest that may affect the authors' interpretation of the results? |   | x |  |  |
| 20 | Was ethical approval or consent of participants attained?                                                           | x |   |  |  |

| <b>König et al. (2017)</b> |                                                         |            |           |                   |                       |
|----------------------------|---------------------------------------------------------|------------|-----------|-------------------|-----------------------|
|                            | <b>QUESTION</b>                                         | <b>YES</b> | <b>NO</b> | <b>Don't know</b> | <b>Not applicable</b> |
| <i>Introduction</i>        |                                                         |            |           |                   |                       |
| 1                          | Were the aims/objectives of the study clear?            | x          |           |                   |                       |
| <i>Methods</i>             |                                                         |            |           |                   |                       |
| 2                          | Was the study design appropriate for the stated aim(s)? | x          |           |                   |                       |
| 3                          | Was the sample size justified?                          | x          |           |                   |                       |

|    |                                                                                                                                                       |   |  |   |  |
|----|-------------------------------------------------------------------------------------------------------------------------------------------------------|---|--|---|--|
| 4  | Was the target/reference population clearly defined? (Is it clear who the research was about?)                                                        | x |  |   |  |
| 5  | Was the sample frame taken from an appropriate population base so that it closely represented the target/reference population under investigation?    | x |  |   |  |
| 6  | Was the selection process likely to select subjects/participants that were representative of the target/reference population under investigation?     | x |  |   |  |
| 7  | Were measures undertaken to address and categorise non-responders?                                                                                    |   |  | x |  |
| 8  | Were the risk factor and outcome variables measured appropriate to the aims of the study?                                                             | x |  |   |  |
| 9  | Were the risk factor and outcome variables measured correctly using instruments/measurements that had been trialled, piloted or published previously? | x |  |   |  |
| 10 | Is it clear what was used to determine statistical significance and/or precision estimates? (e.g. p-values, confidence intervals)                     | x |  |   |  |
| 11 | Were the methods (including statistical methods) sufficiently described to enable them to be repeated?                                                | x |  |   |  |

|                   |                                                                           |   |   |  |  |
|-------------------|---------------------------------------------------------------------------|---|---|--|--|
| <i>Results</i>    |                                                                           |   |   |  |  |
| 12                | Were the basic data adequately described?                                 | x |   |  |  |
| 13                | Does the response rate raise concerns about non-response bias?            | x |   |  |  |
| 14                | If appropriate, was information about non-responders described?           |   | x |  |  |
| 15                | Were the results internally consistent?                                   | x |   |  |  |
| 16                | Were the results presented for all the analyses described in the methods? | x |   |  |  |
| <i>Discussion</i> |                                                                           |   |   |  |  |
| 17                | Were the authors' discussions and conclusions justified by the results?   | x |   |  |  |
| 18                | Were the limitations of the study discussed?                              | x |   |  |  |

|              |                                                                                                                     |   |   |  |  |
|--------------|---------------------------------------------------------------------------------------------------------------------|---|---|--|--|
| <i>Other</i> |                                                                                                                     |   |   |  |  |
| 19           | Were there any funding sources or conflicts of interest that may affect the authors' interpretation of the results? |   | X |  |  |
| 20           | Was ethical approval or consent of participants attained?                                                           | X |   |  |  |

| <b>Naszay et al. (2017)</b> |                                                         |            |           |                   |                       |
|-----------------------------|---------------------------------------------------------|------------|-----------|-------------------|-----------------------|
|                             | <b>QUESTION</b>                                         | <b>YES</b> | <b>NO</b> | <b>Don't know</b> | <b>Not applicable</b> |
| <i>Introduction</i>         |                                                         |            |           |                   |                       |
| 1                           | Were the aims/objectives of the study clear?            | X          |           |                   |                       |
| <i>Methods</i>              |                                                         |            |           |                   |                       |
| 2                           | Was the study design appropriate for the stated aim(s)? | X          |           |                   |                       |

|    |                                                                                                                                                       |   |  |   |  |
|----|-------------------------------------------------------------------------------------------------------------------------------------------------------|---|--|---|--|
| 3  | Was the sample size justified?                                                                                                                        | x |  |   |  |
| 4  | Was the target/reference population clearly defined? (Is it clear who the research was about?)                                                        | x |  |   |  |
| 5  | Was the sample frame taken from an appropriate population base so that it closely represented the target/reference population under investigation?    | x |  |   |  |
| 6  | Was the selection process likely to select subjects/participants that were representative of the target/reference population under investigation?     | x |  |   |  |
| 7  | Were measures undertaken to address and categorise non-responders?                                                                                    |   |  | x |  |
| 8  | Were the risk factor and outcome variables measured appropriate to the aims of the study?                                                             | x |  |   |  |
| 9  | Were the risk factor and outcome variables measured correctly using instruments/measurements that had been trialled, piloted or published previously? | x |  |   |  |
| 10 | Is it clear what was used to determine statistical significance and/or precision estimates? (e.g. p-values, confidence intervals)                     | x |  |   |  |
| 11 | Were the methods (including statistical methods) sufficiently described to enable them to be repeated?                                                | x |  |   |  |



| <i>Results</i>    |                                                                           |   |   |  |  |
|-------------------|---------------------------------------------------------------------------|---|---|--|--|
| 12                | Were the basic data adequately described?                                 | x |   |  |  |
| 13                | Does the response rate raise concerns about non-response bias?            |   | x |  |  |
| 14                | If appropriate, was information about non-responders described?           |   | x |  |  |
| 15                | Were the results internally consistent?                                   | x |   |  |  |
| 16                | Were the results presented for all the analyses described in the methods? | x |   |  |  |
| <i>Discussion</i> |                                                                           |   |   |  |  |
| 17                | Were the authors' discussions and conclusions justified by the results?   | x |   |  |  |
| 18                | Were the limitations of the study discussed?                              | x |   |  |  |

|              |                                                                                                                     |   |   |  |
|--------------|---------------------------------------------------------------------------------------------------------------------|---|---|--|
| <i>Other</i> |                                                                                                                     |   |   |  |
| 19           | Were there any funding sources or conflicts of interest that may affect the authors' interpretation of the results? |   | x |  |
| 20           | Was ethical approval or consent of participants attained?                                                           | x |   |  |

| <b>Seifert et al. (2017)</b> |                                              |            |           |                   |                       |
|------------------------------|----------------------------------------------|------------|-----------|-------------------|-----------------------|
|                              | <b>QUESTION</b>                              | <b>YES</b> | <b>NO</b> | <b>Don't know</b> | <b>Not applicable</b> |
| <i>Introduction</i>          |                                              |            |           |                   |                       |
| 1                            | Were the aims/objectives of the study clear? | x          |           |                   |                       |
| <i>Methods</i>               |                                              |            |           |                   |                       |

|    |                                                                                                                                                       |   |   |   |  |
|----|-------------------------------------------------------------------------------------------------------------------------------------------------------|---|---|---|--|
| 2  | Was the study design appropriate for the stated aim(s)?                                                                                               | x |   |   |  |
| 3  | Was the sample size justified?                                                                                                                        |   | x |   |  |
| 4  | Was the target/reference population clearly defined? (Is it clear who the research was about?)                                                        | x |   |   |  |
| 5  | Was the sample frame taken from an appropriate population base so that it closely represented the target/reference population under investigation?    | x |   |   |  |
| 6  | Was the selection process likely to select subjects/participants that were representative of the target/reference population under investigation?     | x |   |   |  |
| 7  | Were measures undertaken to address and categorise non-responders?                                                                                    |   |   | x |  |
| 8  | Were the risk factor and outcome variables measured appropriate to the aims of the study?                                                             | x |   |   |  |
| 9  | Were the risk factor and outcome variables measured correctly using instruments/measurements that had been trialled, piloted or published previously? |   |   | x |  |
| 10 | Is it clear what was used to determine statistical significance and/or precision estimates? (e.g. p-values, confidence intervals)                     | x |   |   |  |

|                   |                                                                                                        |   |   |  |  |
|-------------------|--------------------------------------------------------------------------------------------------------|---|---|--|--|
| 11                | Were the methods (including statistical methods) sufficiently described to enable them to be repeated? | x |   |  |  |
| <i>Results</i>    |                                                                                                        |   |   |  |  |
| 12                | Were the basic data adequately described?                                                              | x |   |  |  |
| 13                | Does the response rate raise concerns about non-response bias?                                         | x | x |  |  |
| 14                | If appropriate, was information about non-responders described?                                        |   | x |  |  |
| 15                | Were the results internally consistent?                                                                | x |   |  |  |
| 16                | Were the results presented for all the analyses described in the methods?                              | x |   |  |  |
| <i>Discussion</i> |                                                                                                        |   |   |  |  |
| 17                | Were the authors' discussions and conclusions justified by the results?                                | x |   |  |  |

|              |                                                                                                                     |   |   |  |  |
|--------------|---------------------------------------------------------------------------------------------------------------------|---|---|--|--|
| 18           | Were the limitations of the study discussed?                                                                        | x |   |  |  |
| <i>Other</i> |                                                                                                                     |   |   |  |  |
| 19           | Were there any funding sources or conflicts of interest that may affect the authors' interpretation of the results? |   | x |  |  |
| 20           | Was ethical approval or consent of participants attained?                                                           | x |   |  |  |

| <b>Mackert et al. (2016)</b> |                                              |            |           |                   |                       |
|------------------------------|----------------------------------------------|------------|-----------|-------------------|-----------------------|
|                              | <b>QUESTION</b>                              | <b>YES</b> | <b>NO</b> | <b>Don't know</b> | <b>Not applicable</b> |
| <i>Introduction</i>          |                                              |            |           |                   |                       |
| 1                            | Were the aims/objectives of the study clear? | x          |           |                   |                       |
| <i>Methods</i>               |                                              |            |           |                   |                       |

|    |                                                                                                                                                       |   |   |   |  |
|----|-------------------------------------------------------------------------------------------------------------------------------------------------------|---|---|---|--|
| 2  | Was the study design appropriate for the stated aim(s)?                                                                                               | x |   |   |  |
| 3  | Was the sample size justified?                                                                                                                        |   | x |   |  |
| 4  | Was the target/reference population clearly defined? (Is it clear who the research was about?)                                                        | x |   |   |  |
| 5  | Was the sample frame taken from an appropriate population base so that it closely represented the target/reference population under investigation?    |   |   | x |  |
| 6  | Was the selection process likely to select subjects/participants that were representative of the target/reference population under investigation?     |   |   | x |  |
| 7  | Were measures undertaken to address and categorise non-responders?                                                                                    |   |   | x |  |
| 8  | Were the risk factor and outcome variables measured appropriate to the aims of the study?                                                             | x |   |   |  |
| 9  | Were the risk factor and outcome variables measured correctly using instruments/measurements that had been trialled, piloted or published previously? | x |   |   |  |
| 10 | Is it clear what was used to determine statistical significance and/or precision estimates? (e.g. p-values, confidence intervals)                     | x |   |   |  |

|                   |                                                                                                        |   |   |   |  |
|-------------------|--------------------------------------------------------------------------------------------------------|---|---|---|--|
| 11                | Were the methods (including statistical methods) sufficiently described to enable them to be repeated? |   | x |   |  |
| <i>Results</i>    |                                                                                                        |   |   |   |  |
| 12                | Were the basic data adequately described?                                                              | x |   |   |  |
| 13                | Does the response rate raise concerns about non-response bias?                                         |   |   | x |  |
| 14                | If appropriate, was information about non-responders described?                                        |   | x |   |  |
| 15                | Were the results internally consistent?                                                                | x |   |   |  |
| 16                | Were the results presented for all the analyses described in the methods?                              | x |   |   |  |
| <i>Discussion</i> |                                                                                                        |   |   |   |  |
| 17                | Were the authors' discussions and conclusions justified by the results?                                | x |   |   |  |

|              |                                                                                                                     |   |   |   |  |
|--------------|---------------------------------------------------------------------------------------------------------------------|---|---|---|--|
| 18           | Were the limitations of the study discussed?                                                                        | x |   |   |  |
| <i>Other</i> |                                                                                                                     |   |   |   |  |
| 19           | Were there any funding sources or conflicts of interest that may affect the authors' interpretation of the results? |   | x |   |  |
| 20           | Was ethical approval or consent of participants attained?                                                           |   |   | x |  |



**MMAT quality appraisal**

| 1. QUALITATIVE STUDIES  | 0.1. - Are there clear qualitative research questions?  | 0.2. - Do the collected data allow address the research question? |
|-------------------------|---------------------------------------------------------|-------------------------------------------------------------------|
| Cabrita et al. (2019)   | <b>YES</b>                                              | <b>YES</b>                                                        |
|                         | NO                                                      | NO                                                                |
|                         | CAN'T TELL / Somewhat                                   | CAN'T TELL / Somewhat                                             |
|                         |                                                         |                                                                   |
|                         | <i>Screening question</i>                               | <i>Screening question</i>                                         |
| 2. QUANTITATIVE STUDIES | 0.1. - Are there clear quantitative research questions? | 0.2. - Do the collected data allow address the research question? |
| Bol et al. (2018)       | <b>YES</b>                                              | <b>YES</b>                                                        |
|                         | NO                                                      | NO                                                                |
|                         | CAN'T TELL                                              | CAN'T TELL                                                        |
| König et al. (2018)     | <b>YES</b>                                              | <b>YES</b>                                                        |
|                         | NO                                                      | NO                                                                |
|                         | CAN'T TELL                                              | CAN'T TELL                                                        |
| Naszay et al. (2018)    | <b>YES</b>                                              | <b>YES</b>                                                        |
|                         | NO                                                      | NO                                                                |
|                         | CAN'T TELL                                              | CAN'T TELL                                                        |

|                              |            |            |
|------------------------------|------------|------------|
| <b>Seifert et al. (2017)</b> | <b>YES</b> | <b>YES</b> |
|                              | NO         | NO         |
|                              | CAN'T TELL | CAN'T TELL |
| <b>Mackert et al. (2016)</b> | <b>YES</b> | <b>YES</b> |
|                              | NO         | NO         |
|                              | CAN'T TELL | CAN'T TELL |

| <b>1. QUALITATIVE STUDIES</b>  | <b>1.1. - Is the qualitative approach appropriate to answer the research question?</b> | <b>1.2. - Are the qualitative data collection methods adequate to address the research question?</b> | <b>1.3. - Are the findings adequately derived from the data?</b> |
|--------------------------------|----------------------------------------------------------------------------------------|------------------------------------------------------------------------------------------------------|------------------------------------------------------------------|
| <b>Cabrita et al. (2019)</b>   | <b>YES</b>                                                                             | <b>YES</b>                                                                                           | <b>YES</b>                                                       |
|                                | NO                                                                                     | NO                                                                                                   | NO                                                               |
|                                | CAN'T TELL / Somewhat                                                                  | CAN'T TELL / Somewhat                                                                                | <b>CAN'T TELL / Somewhat</b>                                     |
|                                |                                                                                        |                                                                                                      |                                                                  |
|                                |                                                                                        |                                                                                                      |                                                                  |
| <b>2. QUANTITATIVE STUDIES</b> | <b>2.1. - Is the sampling strategy relevant to address the research question?</b>      | <b>2.2. - Is the sample representative of the target population?</b>                                 | <b>2.3. - Are the measurements appropriate?</b>                  |
| <b>Bol et al. (2018)</b>       | <b>YES</b>                                                                             | <b>YES</b>                                                                                           | <b>YES</b>                                                       |
|                                | NO                                                                                     | NO                                                                                                   | NO                                                               |
|                                | CAN'T TELL                                                                             | CAN'T TELL                                                                                           | CAN'T TELL                                                       |
| <b>König et al. (2018)</b>     | <b>YES</b>                                                                             | <b>YES</b>                                                                                           | <b>YES</b>                                                       |
|                                | NO                                                                                     | NO                                                                                                   | NO                                                               |
|                                | CAN'T TELL                                                                             | CAN'T TELL                                                                                           | CAN'T TELL                                                       |

|                              |                   |                   |            |
|------------------------------|-------------------|-------------------|------------|
| <b>Naszay et al. (2018)</b>  | <b>YES</b>        | <b>YES</b>        | <b>YES</b> |
|                              | NO                | NO                | NO         |
|                              | CAN'T TELL        | CAN'T TELL        | CAN'T TELL |
| <b>Seifert et al. (2017)</b> | <b>YES</b>        | <b>YES</b>        | <b>YES</b> |
|                              | NO                | No                | NO         |
|                              | CAN'T TELL        | CAN'T TELL        | CAN'T TELL |
| <b>Mackert et al. (2016)</b> | YES               | YES               | <b>YES</b> |
|                              | NO                | No                | NO         |
|                              | <b>CAN'T TELL</b> | <b>CAN'T TELL</b> | CAN'T TELL |

|                                |                                                                                    |                                                                                                             |
|--------------------------------|------------------------------------------------------------------------------------|-------------------------------------------------------------------------------------------------------------|
| <b>1. QUALITATIVE STUDIES</b>  | <b>1.4. - Is the interpretation of results sufficiently substantiated by data?</b> | <b>1.5. - Is there coherence between qualitative data sources, collection, analysis and interpretation?</b> |
| <b>Cabrita et al. (2019)</b>   | YES                                                                                | YES                                                                                                         |
|                                | <b>NO</b>                                                                          | <b>NO</b>                                                                                                   |
|                                | CAN'T TELL / Somewhat                                                              | CAN'T TELL / Somewhat                                                                                       |
|                                |                                                                                    |                                                                                                             |
|                                |                                                                                    |                                                                                                             |
| <b>2. QUANTITATIVE STUDIES</b> | <b>2.4. - Is the risk of nonresponse bias low?</b>                                 | <b>2.5. - Is the statistical analysis appropriate to answer the research question?</b>                      |
| <b>Bol et al. (2018)</b>       | <b>YES</b>                                                                         | <b>YES</b>                                                                                                  |
|                                | NO                                                                                 | NO                                                                                                          |
|                                | CAN'T TELL                                                                         | CAN'T TELL                                                                                                  |

|                              |                   |            |
|------------------------------|-------------------|------------|
| <b>König et al. (2018)</b>   | YES               | <b>YES</b> |
|                              | NO                | NO         |
|                              | <b>CAN'T TELL</b> | CAN'T TELL |
| <b>Naszay et al. (2018)</b>  | YES               | <b>YES</b> |
|                              | NO                | NO         |
|                              | <b>CAN'T TELL</b> | CAN'T TELL |
| <b>Seifert et al. (2017)</b> | YES               | <b>YES</b> |
|                              | NO                | NO         |
|                              | <b>CAN'T TELL</b> | CAN'T TELL |
| <b>Mackert et al. (2016)</b> | YES               | <b>YES</b> |
|                              | NO                | NO         |
|                              | <b>CAN'T TELL</b> | CAN'T TELL |
